# Supplementary material for: Facile synthesis of mesoporous N doped zirconium titanium mixed oxide nanomaterial with enhanced photocatalytic activity under visible light
Source: Royal Society of Chemistry journal article supplement (doi:10.1039/c0jm01342k), 2010-01-01
Supplement: c0jm01342k.pdf [file c0jm01342k.pdf]

## Facile synthesis of mesoporous N doped zirconium titanium mixed oxide nanomaterial with enhanced photocatalytic activity under visible light

Noor Aman,<sup>a</sup> Trilochan Mishra,<sup>\*a</sup> Ranjan K. Sahu<sup>b</sup>, J. P. Tiwari<sup>c</sup>

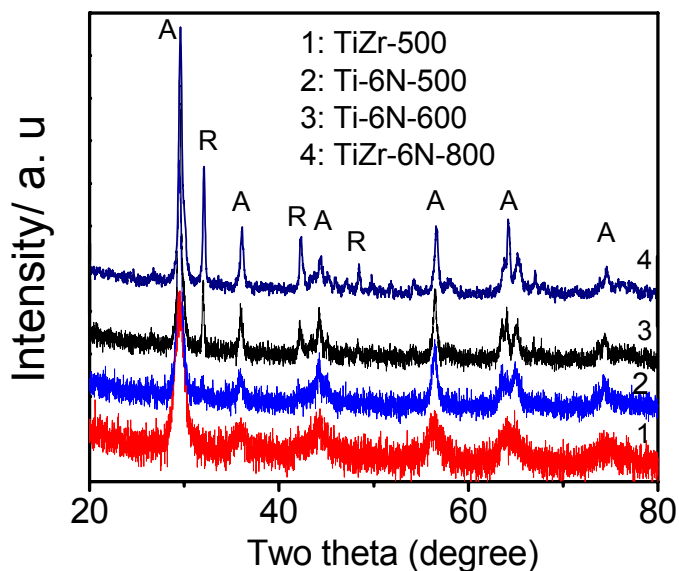

Fig-S1: XRD of different synthesized materials recorded using cobalt source.

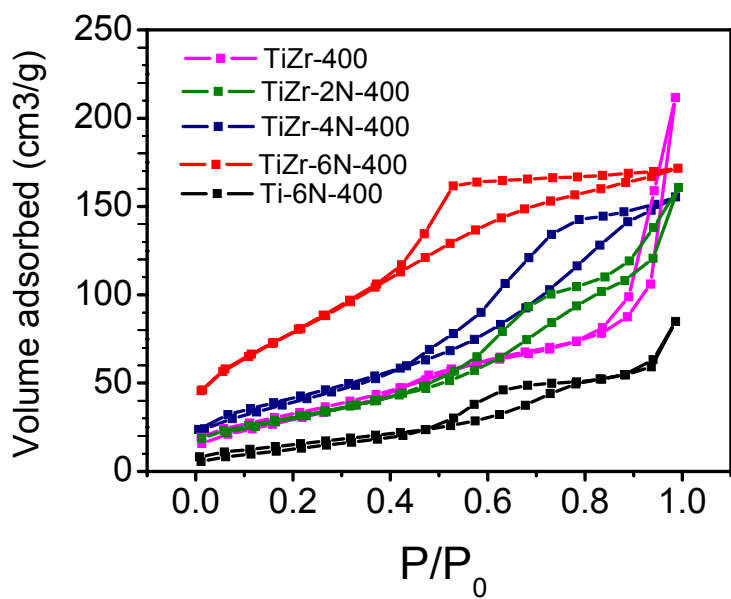

Fig-S2: N<sub>2</sub> adsorption-desorption isotherms of the synthesized materials.

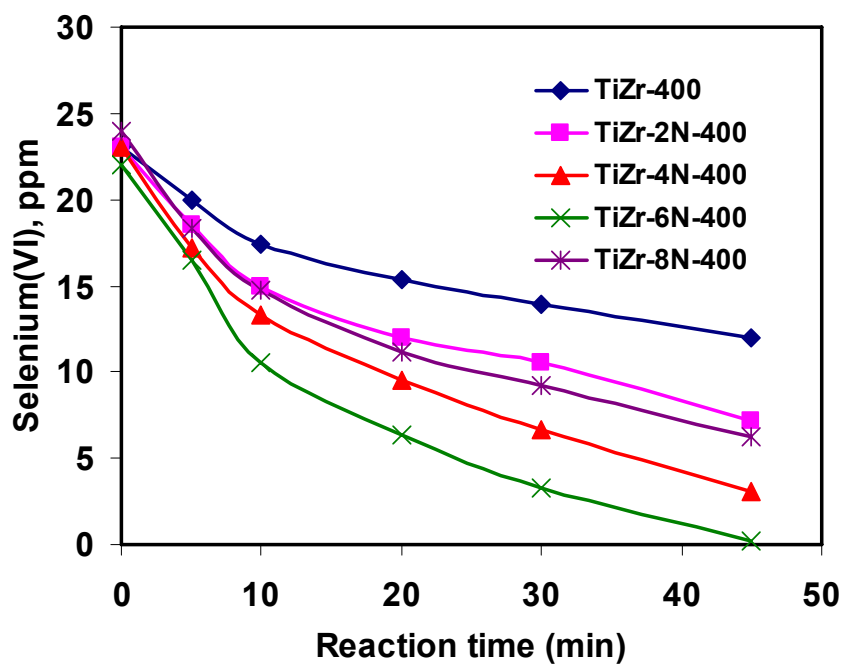

Fig-S3: Plot of selenium reduction with time over different synthesized materials.
